# Supplementary material for: Response to Stimulations Inducing Circadian Rhythm in Human Induced Pluripotent Stem Cells
Source: MDPI journal article supplement (doi:10.3390/cells9030620), 2020-03-04
Supplement: s1 [file s1]

iPS

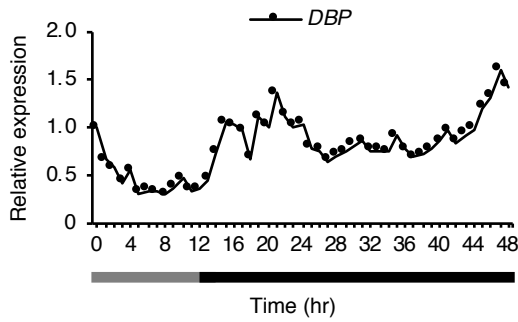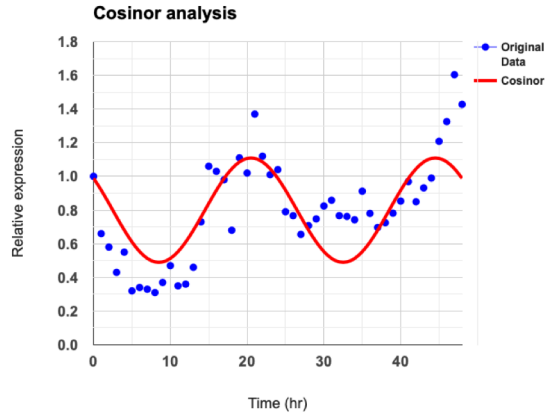

**Supplementary Figure S1.** The response of *DBP* to the simulated rhythm of body temperature. Left, the expression levels of *DBP* under the temperature rhythm was measured in hiPSCs. 0 h refers the start of day 5 of the temperature rhythm. The temperature was set at 33 °C from 0 to 12 h (gray bar) and then at 37 °C from 12 to 48 h (black bar). Data are presented as the means  $\pm$  SEM relative to 0 h.  $n = 2$ .  $P$  value for the rhythmicity of *DBP* expression was determined by cosinor analysis and it was  $p < 0.01$ . Right, red line indicates the significant cosinor function fit analyzed from left data.
